# Supplementary material for: Evaluation of synthon influence on ethenzamide–polyphenol pharmaceutical cocrystals
Source: Royal Society of Chemistry journal article supplement (doi:10.1039/d3ce00234a), 2023-01-01
Supplement: d3ce00234a1.pdf [file d3ce00234a1.pdf]

## Supporting information

### Evaluation of synthon influence on ethenzamide-polyphenol pharmaceutical cocrystals

Francisco Javier Acebedo-Martínez,<sup>a</sup> Alicia Domínguez-Martín,<sup>b</sup> Carolina Alarcón-Payer,<sup>c</sup> Antonio Frontera,<sup>d</sup> Ángel Ibáñez,<sup>b</sup> and Duane Choquesillo-Lazarte<sup>\*a</sup>

<sup>a</sup>Laboratorio de Estudios Cristalográficos, IACT, CSIC-Universidad de Granada, Avda. de las Palmeras 4, 18100 Armilla, Spain.

<sup>b</sup>Department of Inorganic Chemistry, Faculty of Pharmacy, University of Granada, 18071 Granada, Spain.

<sup>c</sup>Servicio de Farmacia, Hospital Universitario Virgen de las Nieves, 18014 Granada, Spain.

<sup>d</sup>Department of Chemistry, Universitat de les Illes Balears, Crta de Valldemossa km 7.5, 07122 Palma de Mallorca (Balears), Spain

Email: [duane.choquesillo@csic.es](mailto:duane.choquesillo@csic.es)

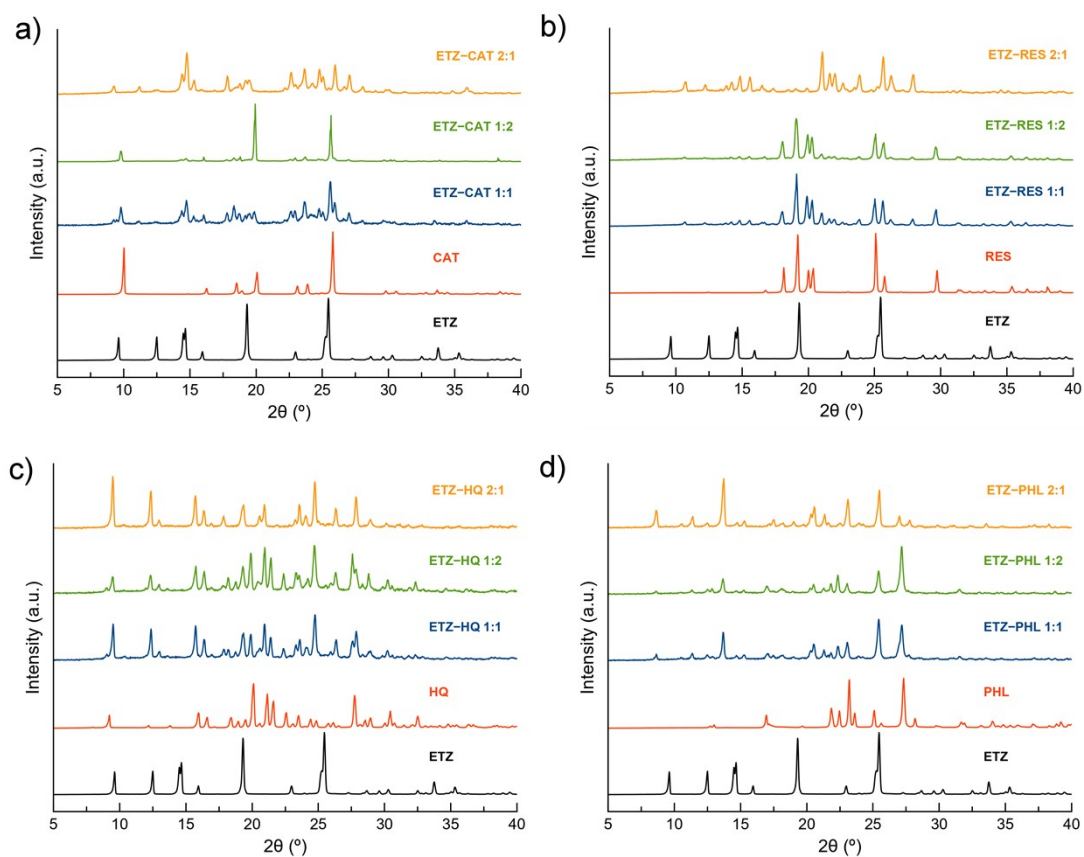

**Fig. S1** Powder X-ray diffraction patterns of the product obtained by liquid-assisted grinding (LAG).

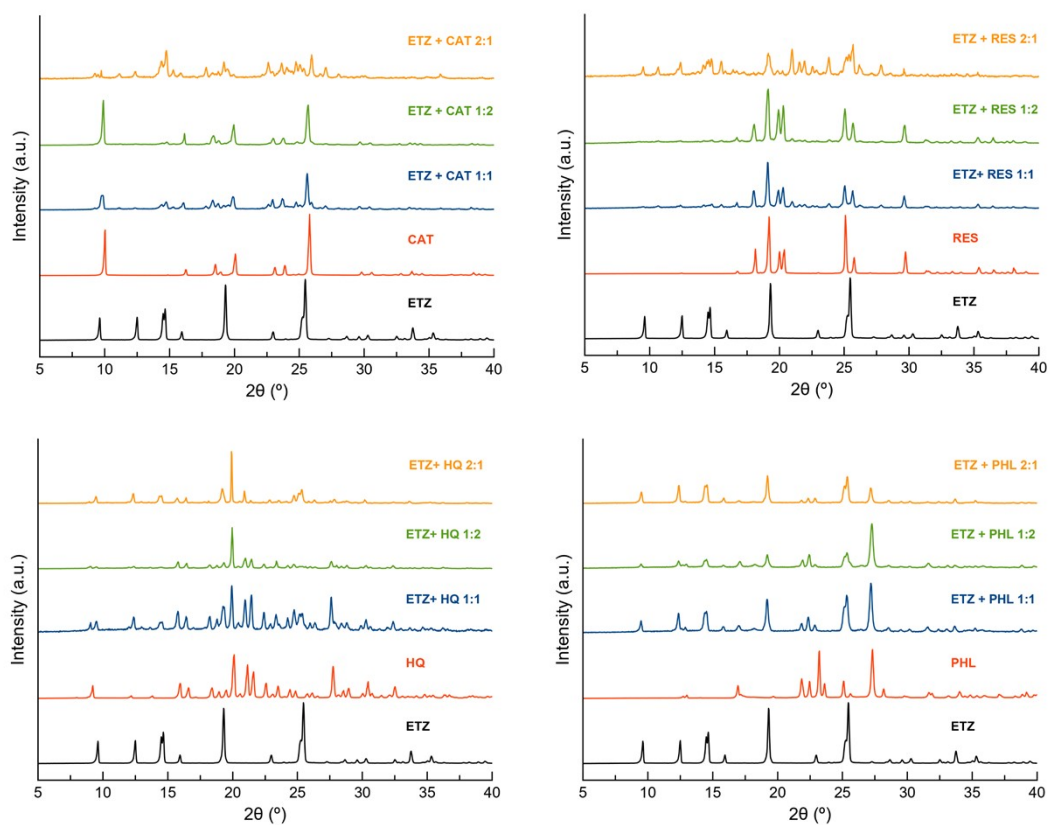

**ig. S2** Powder X-ray diffraction patterns of the products obtained by neat grinding in different stoichiometric ratios.

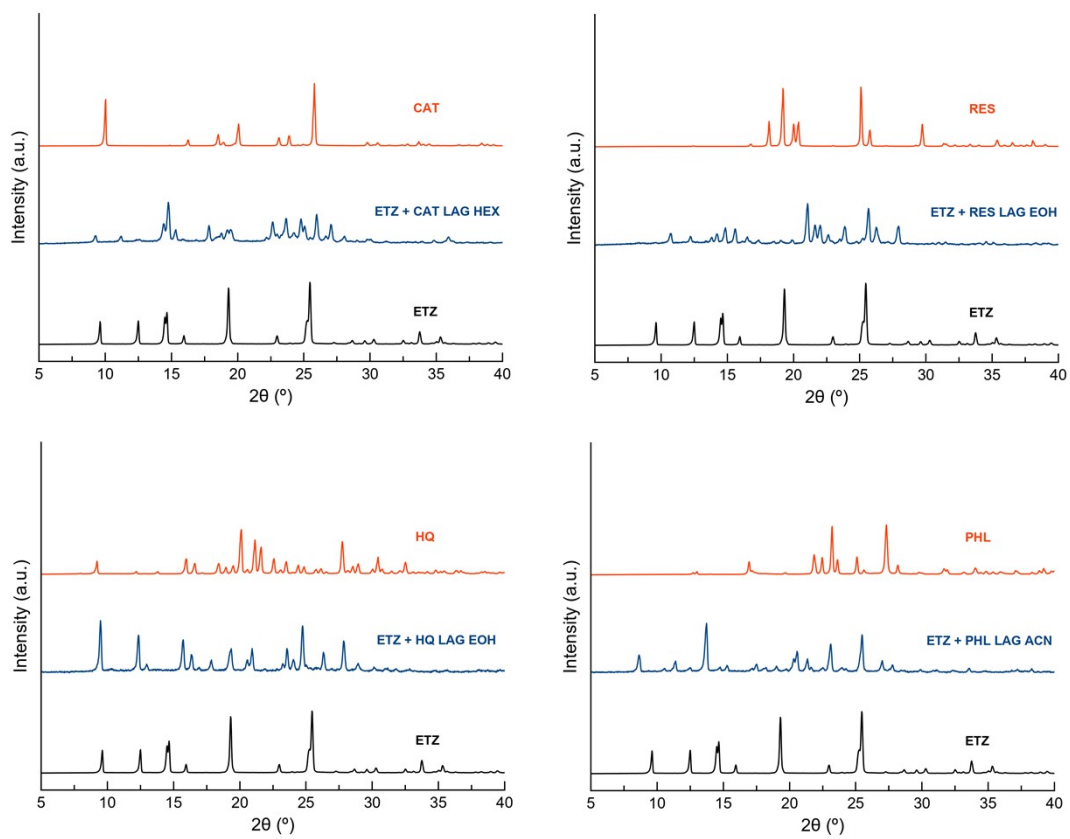

**Fig. S3** Powder X-ray diffraction patterns of the products obtained by liquid-assisted grinding (LAG) in selected solvents at 2:1 stoichiometric ratio.

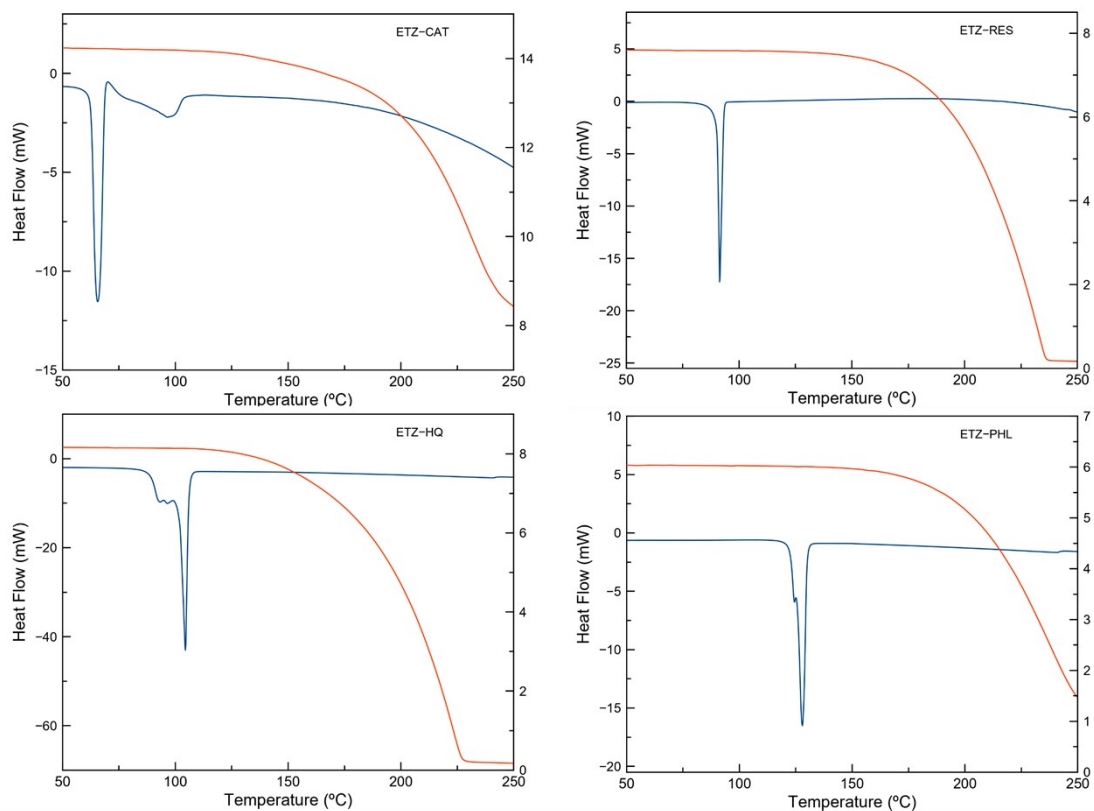

**Fig. S4** Differential scanning calorimetry (DSC) and thermogravimetric (TG) traces of the ETZ cocrystals.

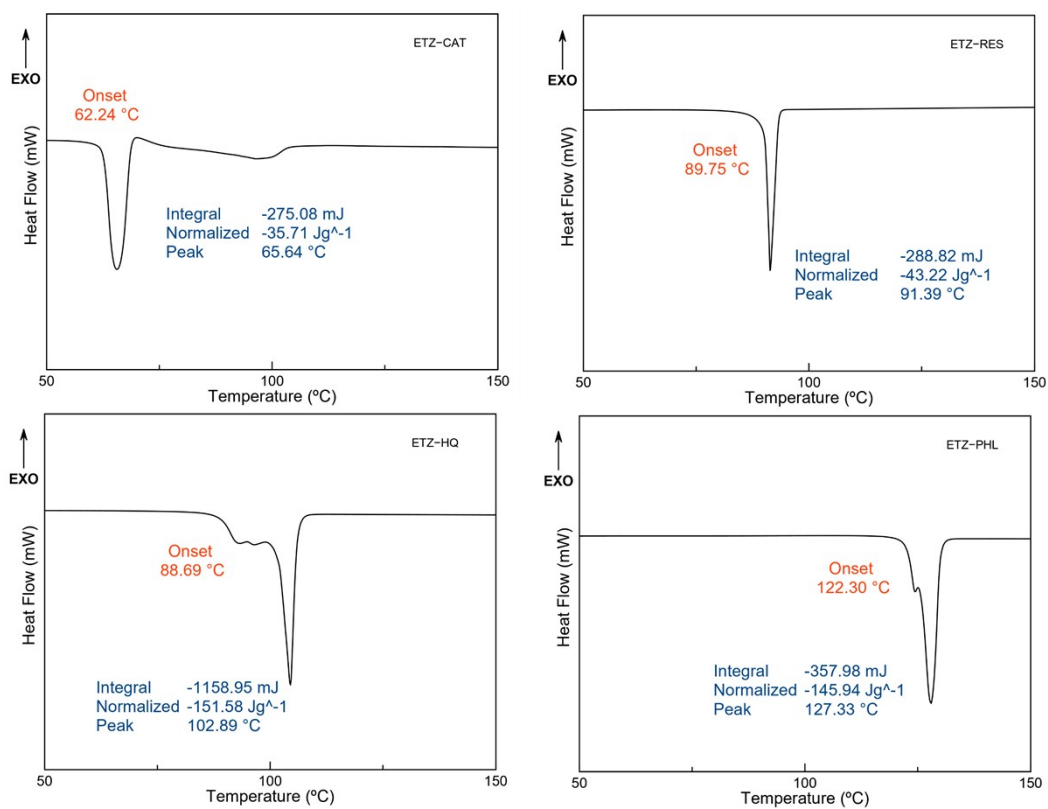

**Fig. S5** DSC traces of novel cocrystals with the corresponding onsets and enthalpies values.

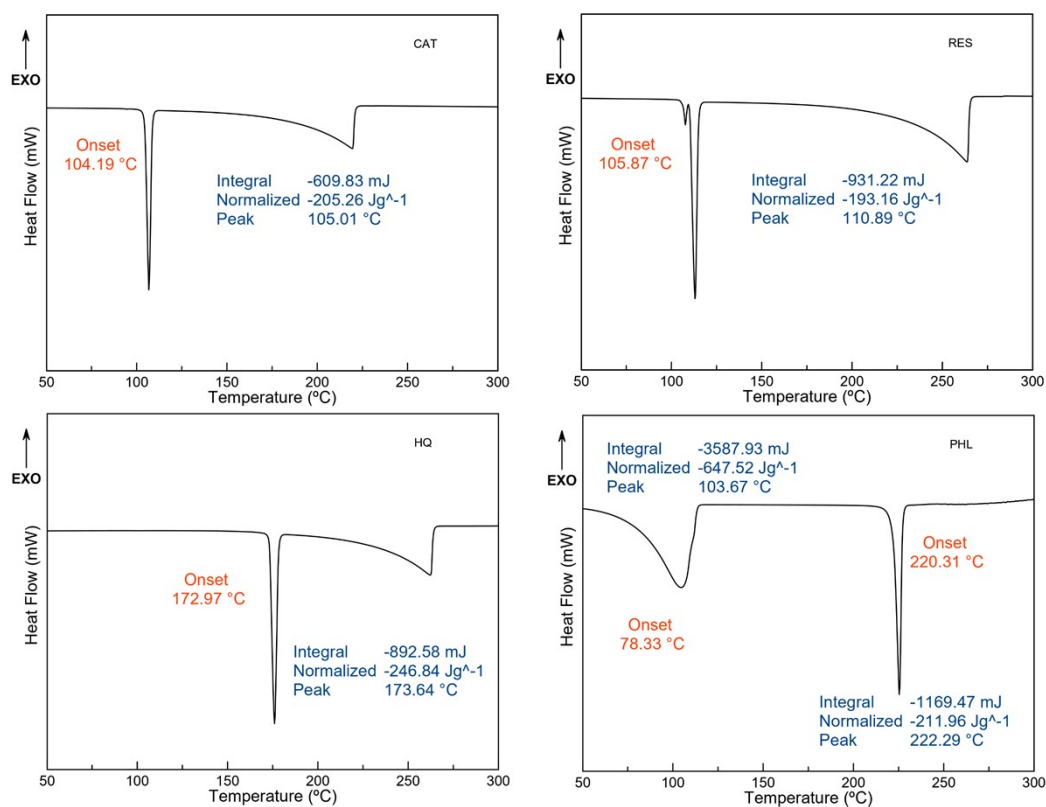

**Fig. S6** DSC of isolated coformers CAT, RES, HQ and PHL used in this work with the corresponding onsets and enthalpies values.

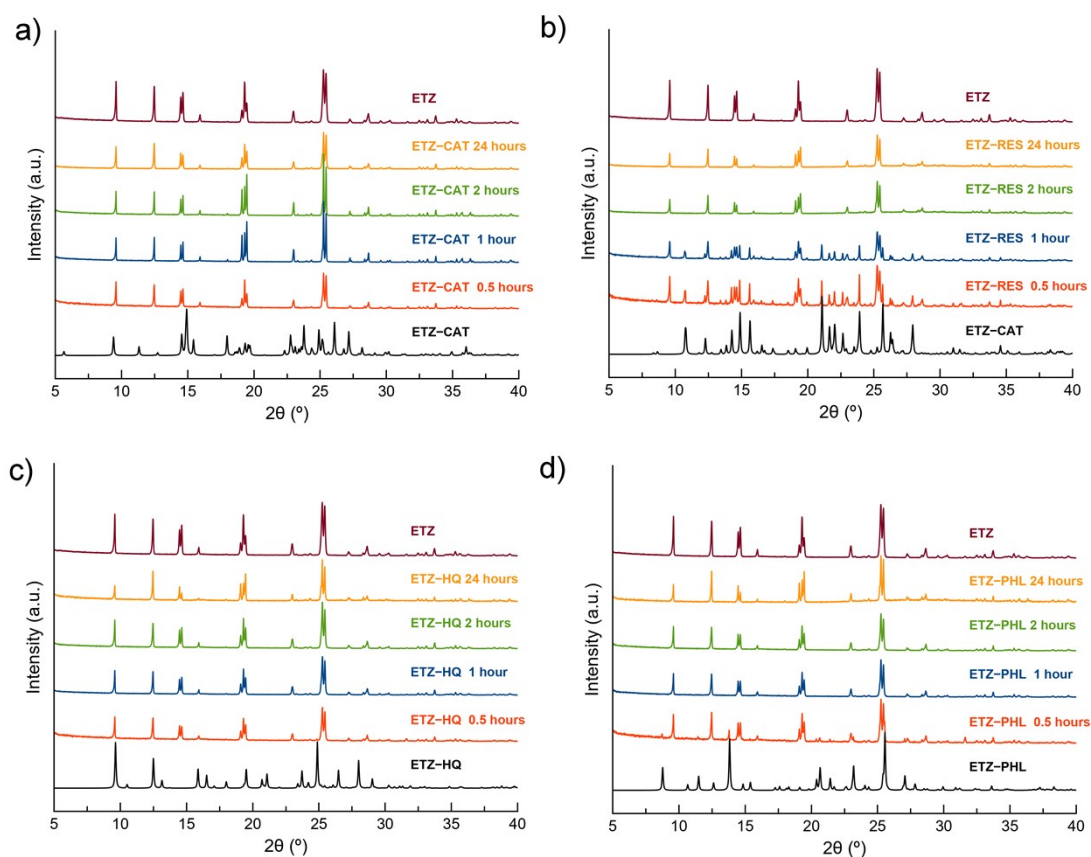

**Fig. S7** PXRD patterns of the reported ETZ cocrystals after aqueous slurry experiments (pH 6.8 phosphate buffer medium) for 24 hours.

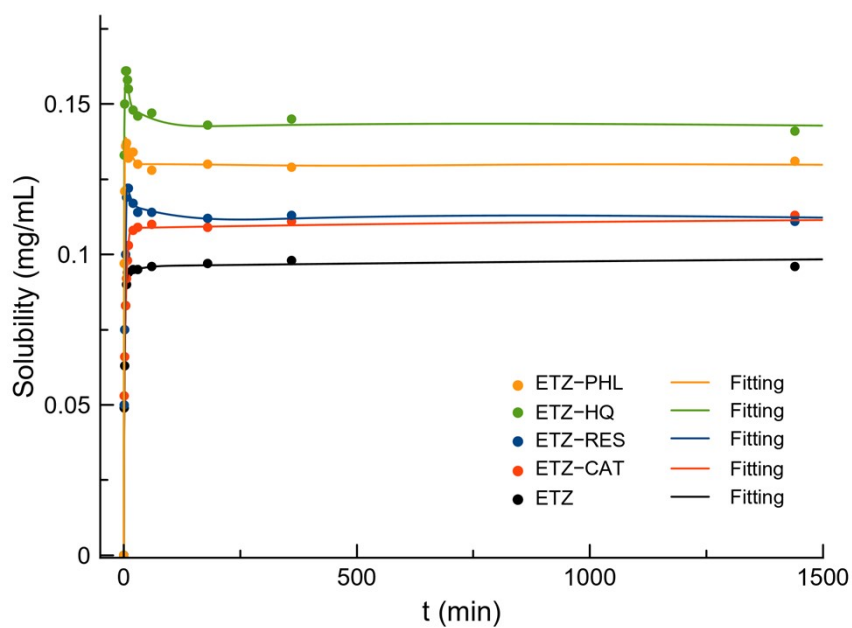

**Fig. S8** Dissolution profile of ETZ and cocrystals at 24 h (1440 min).

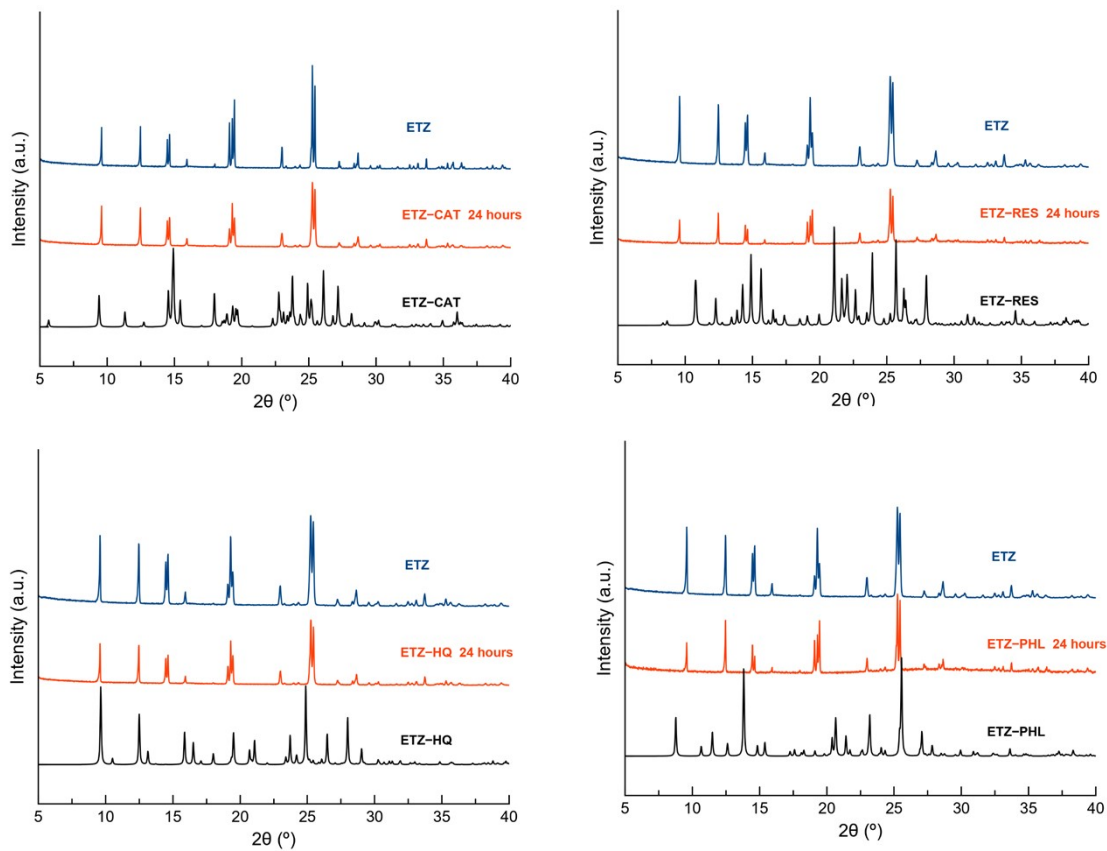

**Fig. S9** XRD patterns of the reported ETZ cocrystals after powder dissolution experiments (pH 6.8 phosphate buffer medium, 24 hours).



**Table 1.** Hydrogen bonds for ETZ cocrystals [ $\text{\AA}$  and deg.].

| <b>ETZ—CAT</b> | D-H $\cdots$ A                                                                                                                      | d(D-H) | d(H $\cdots$ A) | d(D $\cdots$ A) | <(DHA) |
|----------------|-------------------------------------------------------------------------------------------------------------------------------------|--------|-----------------|-----------------|--------|
|                | N(1)-H(1A) $\cdots$ O(3)#1                                                                                                          | 0.86   | 2.23            | 3.084(3)        | 171.3  |
|                | N(1)-H(1B) $\cdots$ O(2)                                                                                                            | 0.86   | 1.99            | 2.649(3)        | 133.2  |
|                | N(2)-H(2A) $\cdots$ O(1)#2                                                                                                          | 0.86   | 2.03            | 2.879(3)        | 168.1  |
|                | N(2)-H(2B) $\cdots$ O(4)                                                                                                            | 0.86   | 1.98            | 2.622(3)        | 131.0  |
|                | O(5)-H(5A) $\cdots$ O(3)                                                                                                            | 0.82   | 1.90            | 2.715(2)        | 172.1  |
|                | O(6)-H(6A) $\cdots$ O(1)                                                                                                            | 0.82   | 1.87            | 2.687(2)        | 173.0  |
|                | Symmetry transformations used to generate equivalent atoms:<br>#1 x-1,y+1,z #2 x+1,y-1,z                                            |        |                 |                 |        |
| <b>ETZ—RES</b> | D-H $\cdots$ A                                                                                                                      | d(D-H) | d(H $\cdots$ A) | d(D $\cdots$ A) | <(DHA) |
|                | N(1)-H(1A) $\cdots$ O(3)#1                                                                                                          | 0.86   | 2.12            | 2.9807(15)      | 176.5  |
|                | N(1)-H(1B) $\cdots$ O(2)                                                                                                            | 0.86   | 1.97            | 2.6369(14)      | 134.0  |
|                | N(2)-H(2A) $\cdots$ O(1)#2                                                                                                          | 0.86   | 2.17            | 2.9603(16)      | 152.8  |
|                | N(2)-H(2B) $\cdots$ O(4)                                                                                                            | 0.86   | 1.97            | 2.6418(14)      | 134.0  |
|                | O(5)-H(5A) $\cdots$ O(1)#2                                                                                                          | 0.82   | 1.89            | 2.6886(15)      | 165.9  |
|                | O(6)-H(6A) $\cdots$ O(3)#3                                                                                                          | 0.82   | 1.94            | 2.7550(14)      | 171.8  |
|                | Symmetry transformations used to generate equivalent atoms:<br>#1 x,-y+3/2,z-1/2 #2 x,-y+3/2,z+1/2 #3 -x+2,y-1/2,-z+3/2             |        |                 |                 |        |
| <b>ETZ—HQ</b>  | D-H $\cdots$ A                                                                                                                      | d(D-H) | d(H $\cdots$ A) | d(D $\cdots$ A) | <(DHA) |
|                | N(1)-H(1A) $\cdots$ O(3)#1                                                                                                          | 0.86   | 2.18            | 2.9861(15)      | 156.2  |
|                | N(1)-H(1B) $\cdots$ O(2)                                                                                                            | 0.86   | 1.97            | 2.6488(14)      | 134.4  |
|                | O(3)-H(3A) $\cdots$ O(1)                                                                                                            | 0.82   | 1.84            | 2.6642(13)      | 178.0  |
|                | Symmetry transformations used to generate equivalent atoms:<br>#1 -x,-y+1,-z                                                        |        |                 |                 |        |
| <b>ETZ—PHL</b> | D-H $\cdots$ A                                                                                                                      | d(D-H) | d(H $\cdots$ A) | d(D $\cdots$ A) | <(DHA) |
|                | N(1)-H(1A) $\cdots$ O(3)#1                                                                                                          | 0.86   | 2.08            | 2.919(4)        | 165.9  |
|                | N(1)-H(1B) $\cdots$ O(2)                                                                                                            | 0.86   | 1.94            | 2.611(4)        | 134.2  |
|                | N(2)-H(2A) $\cdots$ O(1)#2                                                                                                          | 0.86   | 2.07            | 2.933(4)        | 177.3  |
|                | N(2)-H(2B) $\cdots$ O(4)                                                                                                            | 0.86   | 1.95            | 2.623(4)        | 134.0  |
|                | O(5)-H(5A) $\cdots$ O(1)#3                                                                                                          | 0.82   | 1.85            | 2.653(3)        | 167.7  |
|                | O(6)-H(6A) $\cdots$ O(3)#1                                                                                                          | 0.82   | 1.86            | 2.664(3)        | 168.5  |
|                | O(7)-H(7) $\cdots$ O(5)#4                                                                                                           | 0.82   | 2.02            | 2.833(3)        | 169.4  |
|                | Symmetry transformations used to generate equivalent atoms:<br>#1 x+1/2,-y+1,z-1/2 #2 x-1/2,-y+1,z+1/2 #3 x,y-1,z #4 x+1/2,-y,z+1/2 |        |                 |                 |        |
